# Supplementary material for: Minimizing Cholesterol-Induced Aggregation of Membrane-Interacting DNA Origami Nanostructures
Source: MDPI journal article supplement (doi:10.3390/membranes11120950), 2021-11-30
Supplement: s1 [file s1]

# Minimizing Cholesterol-Induced Aggregation of Membrane-Interacting DNA Origami Nanostructures

Jasleen Kaur Daljit Singh <sup>1,2,3</sup>, Minh Tri Luu <sup>1,2,3</sup>, Jonathan F Berengut <sup>1,3</sup>, Ali Abbas <sup>2,3</sup>, Matthew AB Baker <sup>5,6</sup> and Shelley FJ Wickham <sup>1,3,4\*</sup>

<sup>1</sup> School of Chemistry, The University of Sydney, Sydney, New South Wales, 2006, Australia.

<sup>2</sup> School of Chemical and Biomolecular Engineering, The University of Sydney, Sydney, 2006, New South Wales, Australia.

<sup>3</sup> The University of Sydney Nano Institute, The University of Sydney, Sydney, New South Wales, 2006, Australia

<sup>4</sup> School of Physics, The University of Sydney, Sydney, New South Wales, 2006, Australia.

<sup>5</sup> School of Biotechnology and Biomolecular Sciences, University of New South Wales, Sydney, New South Wales, 2052, Australia.

<sup>6</sup> CSIRO Synthetic Biology Future Science Platform, Brisbane, Australia.

\* Correspondence: To whom correspondence should be addressed: [shelley.wickham@sydney.edu.au](mailto:shelley.wickham@sydney.edu.au)

## Supplementary Data

**Supplementary Table S1: List of reagents used**

| <b>Reagent</b>        | <b>Supplier</b>                   |
|-----------------------|-----------------------------------|
| All DNA strands       | Integrated DNA Technologies (IDT) |
| M13mp18 ssDNA (p7249) | P-107, Bayou Biolabs              |
| Tris-HCl              | T3253, Sigma                      |
| NaCl                  | AJA465, Ajax-Finechem             |
| MgCl <sub>2</sub>     | AJA296, Ajax-Finechem             |
| EDTA                  | E9884, Sigma                      |
| MilliQ water          | Milli-Q, Millipore                |
| DOPE 18:1             | 850725P, Avanti Polar Lipids      |
| DOPC 18:1             | 850375P, Avanti Polar Lipids      |
| PE-biotin             | 870282P, Avanti Polar Lipids      |
| SyBrSafe stain        | S33102, Thermo Fisher Scientific  |
| PEG 8000              | P5413, Sigma                      |
| Tris base             | FSBBP152-5, Fisher Scientific     |
| Boric acid            | B7901, Sigma                      |
| Agarose               | BIO-41025, Bioline                |

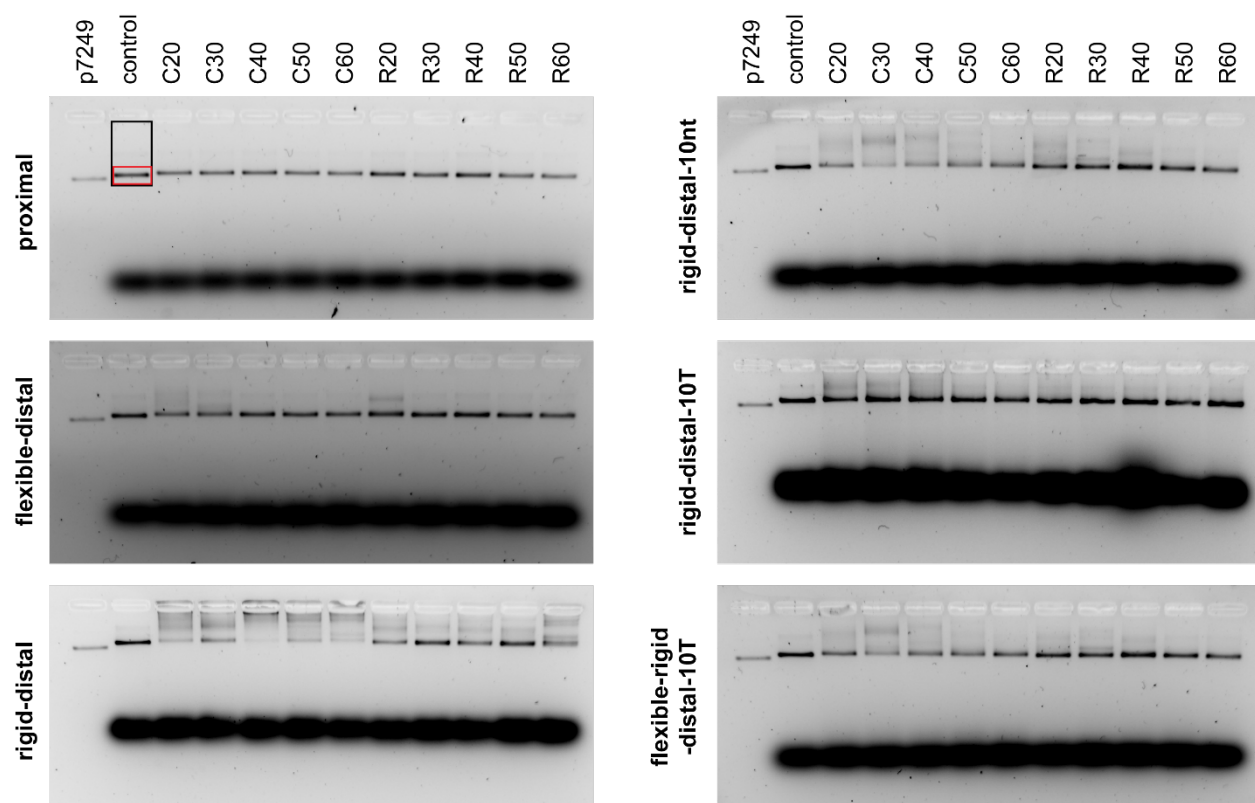

$$\text{absolute yield} = \frac{\text{intensity of band in red box}}{\text{intensity in black box}} \times 100\%$$

$$\text{normalized yield} = \frac{\text{absolute yield (lane of interest)}}{\text{absolute yield (control lane)}} \times 100\%$$

**Supplementary Figure S1:** DOT gels (repeat 1). Control lane is DOT folded with no cholesterol. For each lane, the yields of the DOT band is calculated as shown by the formula in the figure. Band intensities were determined using ImageLab software.

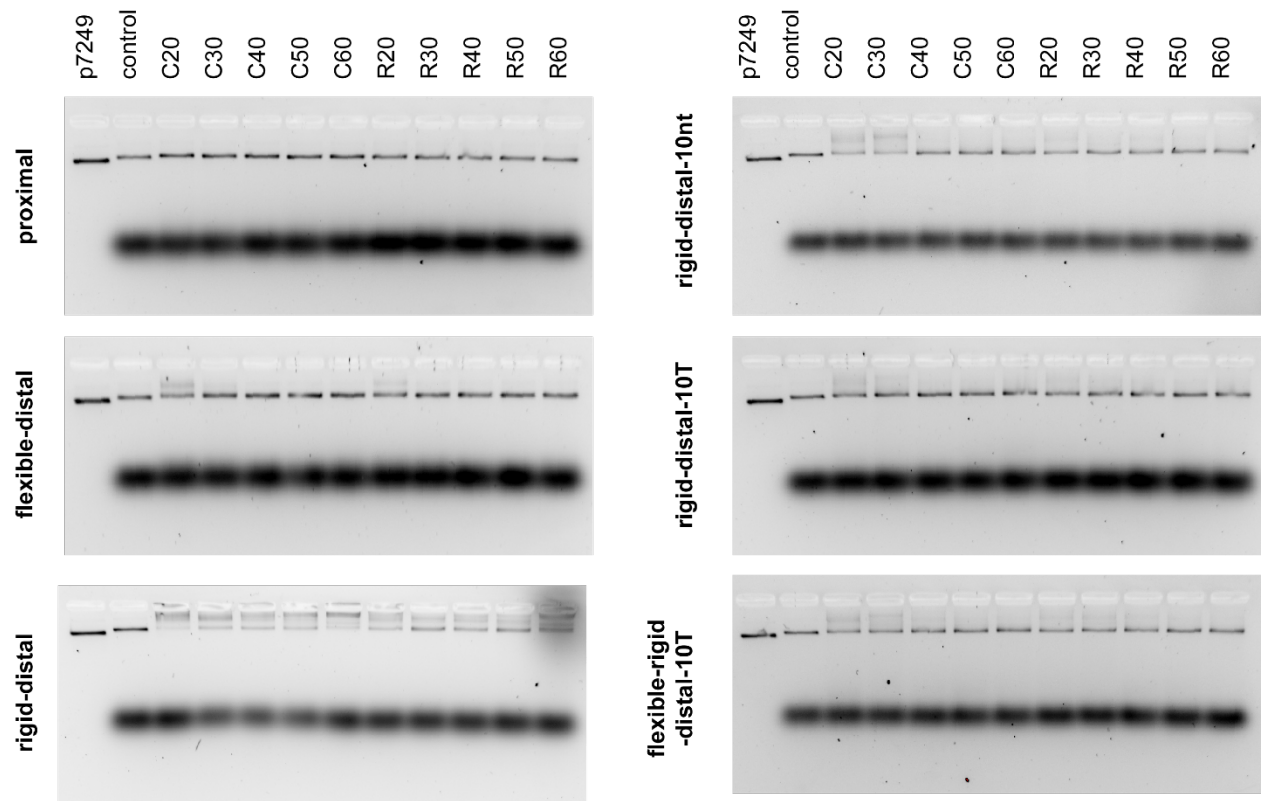

**Supplementary Figure S2:** DOT gels (repeat 2). Control lane is DOT folded with no cholesterol. For each lane, the yield of the DOT band is calculated as shown by the formula in the figure. Band intensities were determined using ImageLab software.

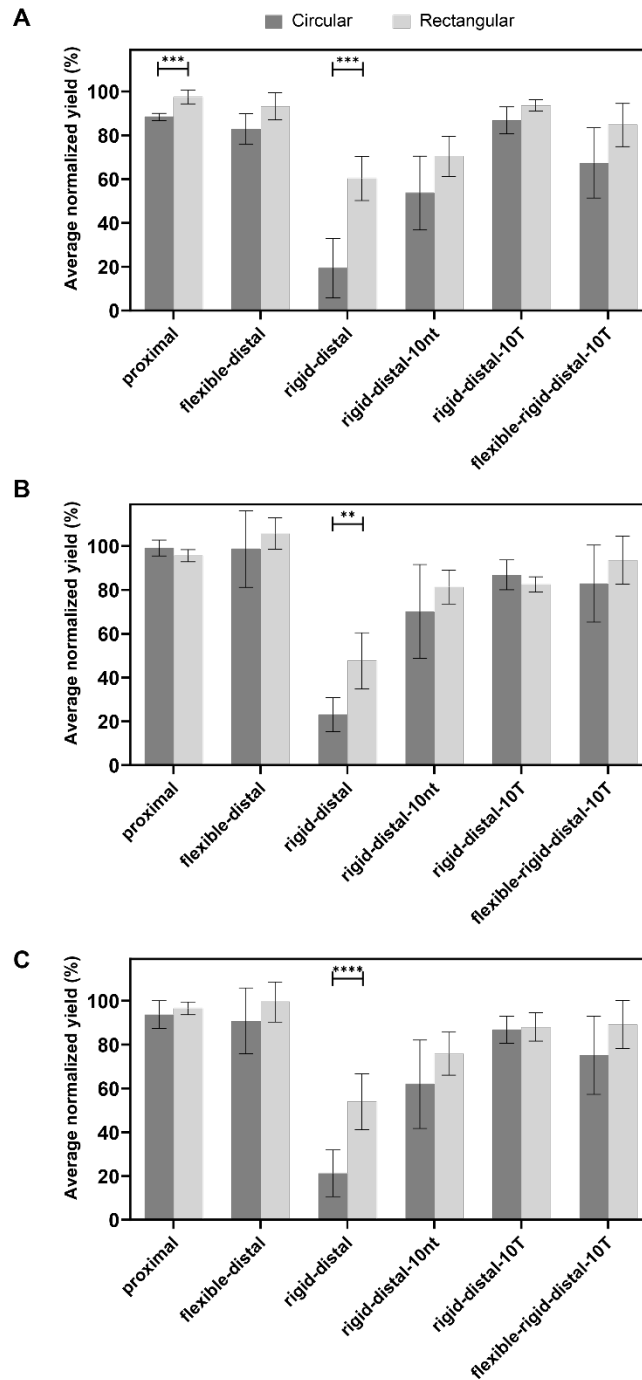

**Supplementary Figure S3:** Average yield for the rectangular and circular configurations on the DOT. The average is obtained by averaging the six different designs for each configuration. A. Average from gel repeat 1. B. Average from gel repeat 2. C. Combined averages from both gel repeats.

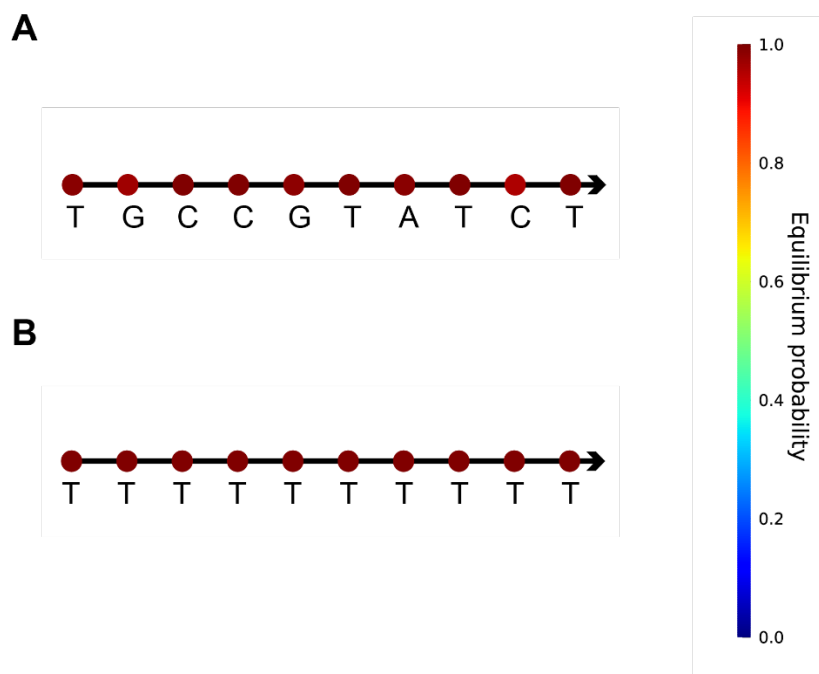

**Supplementary Figure S4:** Nupack analysis of the 10nt overhang (A) and 10T overhang (B). Maximum complex size was set to 2 to test for intra-strand binding, and concentration was set to 10 nM. The structural predictions shown are at 37°C. The stability of the base pairing is shown as a heat-map.

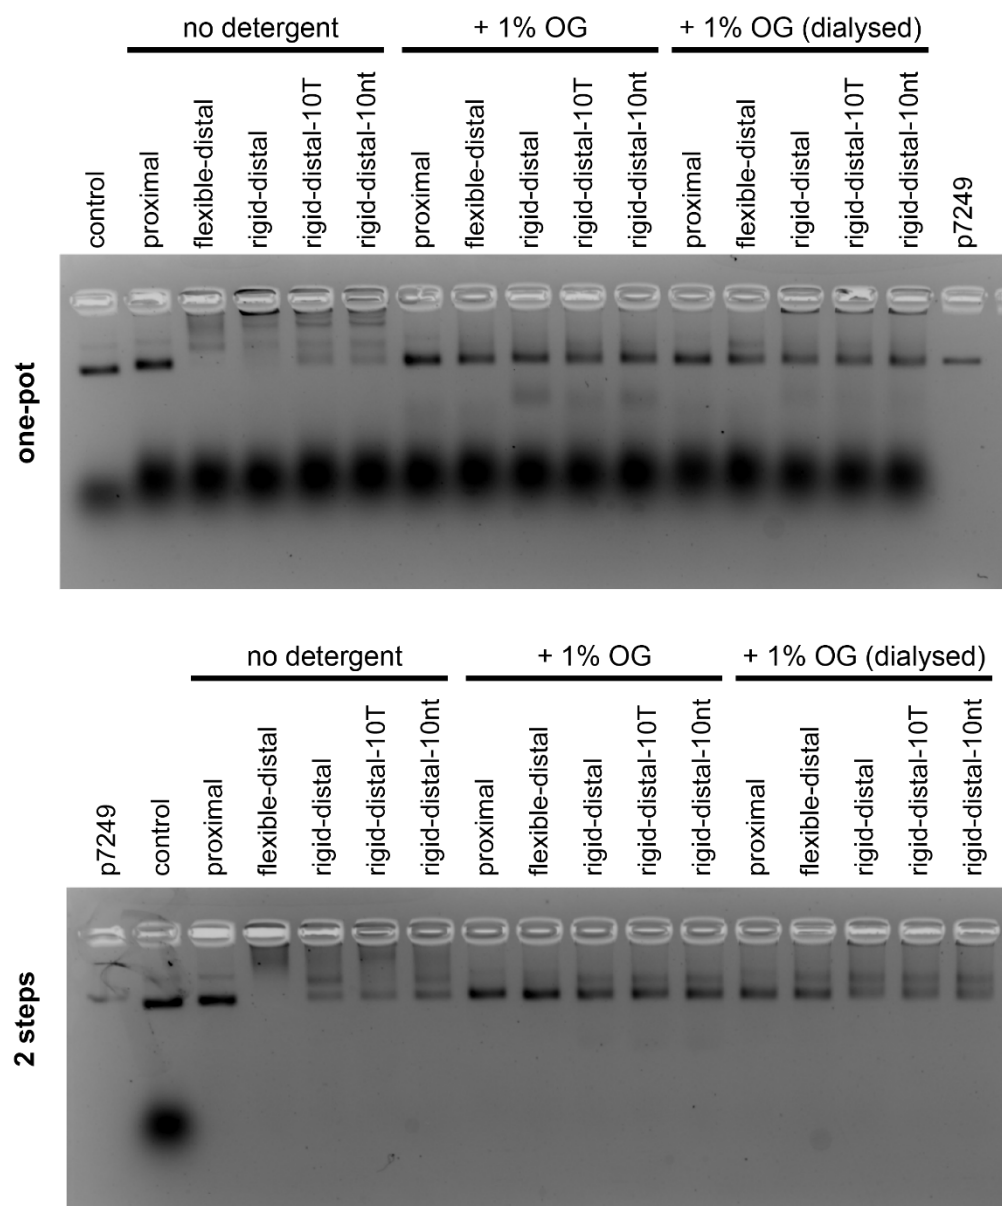

**Supplementary Figure S5:** DOB gels. Control lane is DOB folded with no cholesterol. For each lane, the yield of the DOB band is calculated, using the formula shown in Supplementary Figure 1.

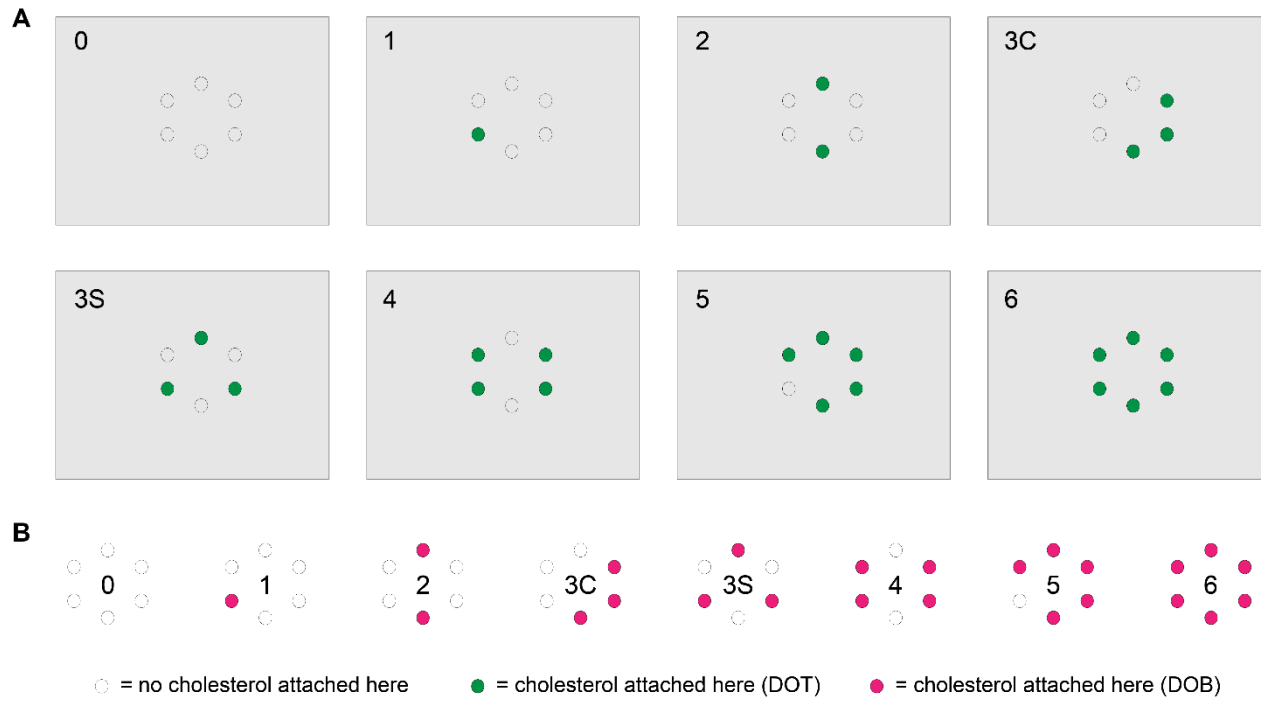

**Supplementary Figure S6:** Position of cholesterol placement on the DOT (A) and DOB (B). The number of cholesterol is stated in the figure. 3C = 3 cholesterol clumped, 3S = 3 cholesterol sparse.



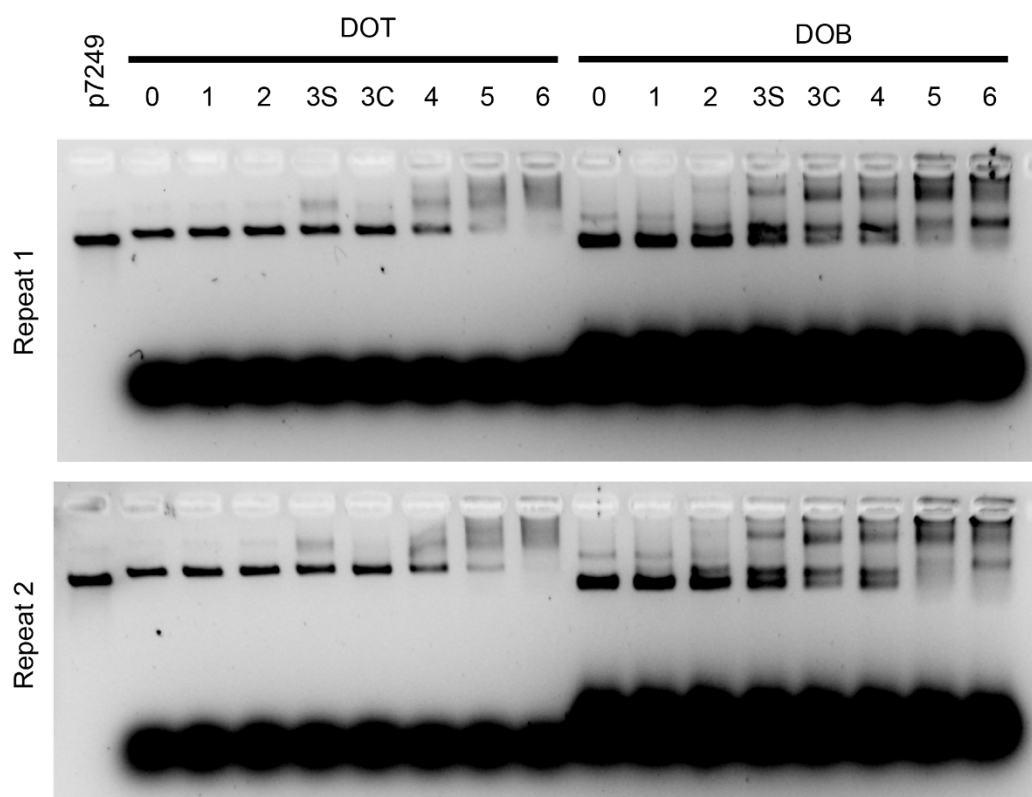

**Supplementary Figure S7:** Gel image DOT and DOB folded with different number of cholesterol. The number of cholesterol is annotated above the gel. 3C = 3 cholesterol clumped, 3S = 3 cholesterol sparse.

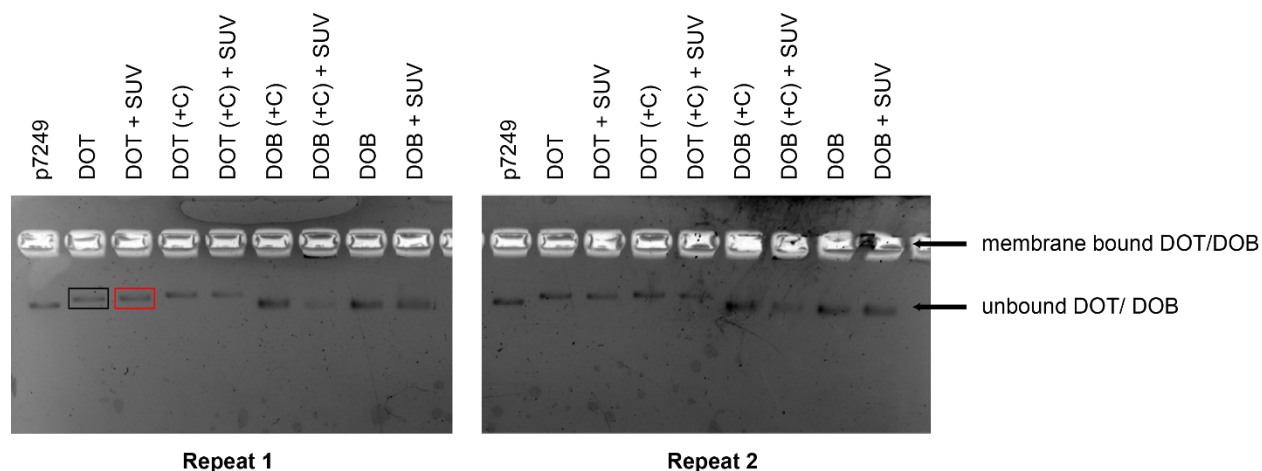

□ DNA nanostructure band without SUVs = U

□ DNA nanostructure band with SUVs = B

$$\% \text{ bound} = (1 - B / U) \times 100\%$$

**Supplementary Figure S8:** Gel-shift assay to evaluate the membrane binding of DOT and DOB. The formula for calculating % bound is given.

**A**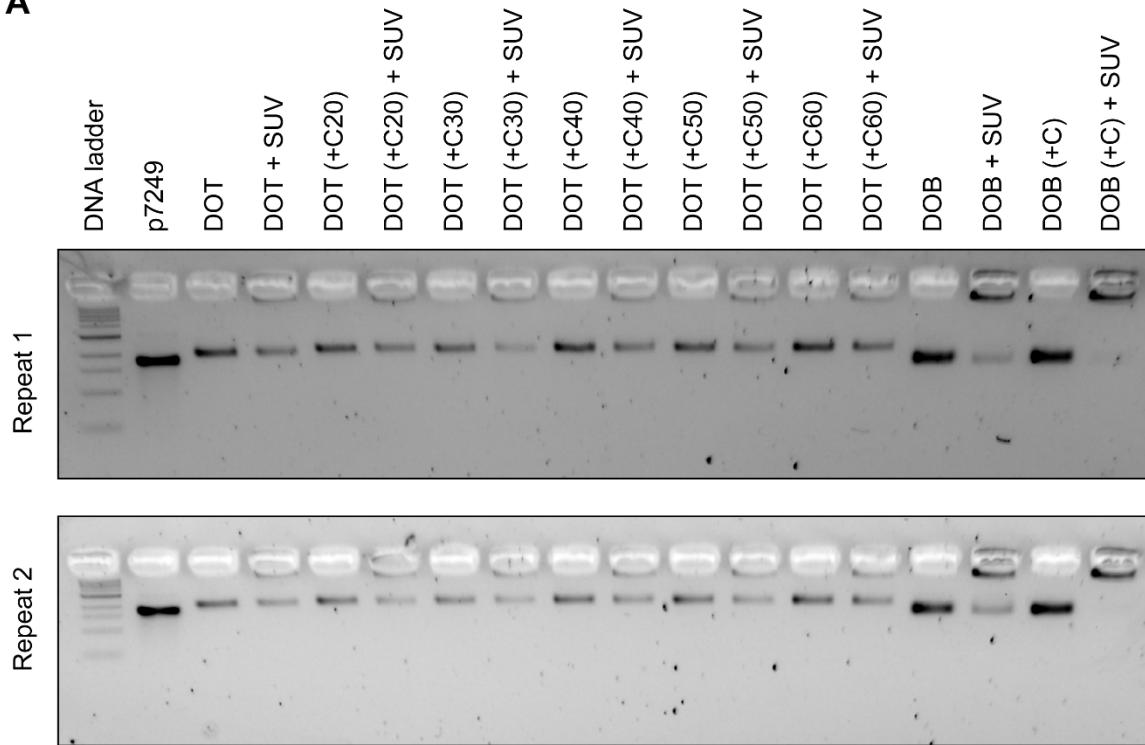**B**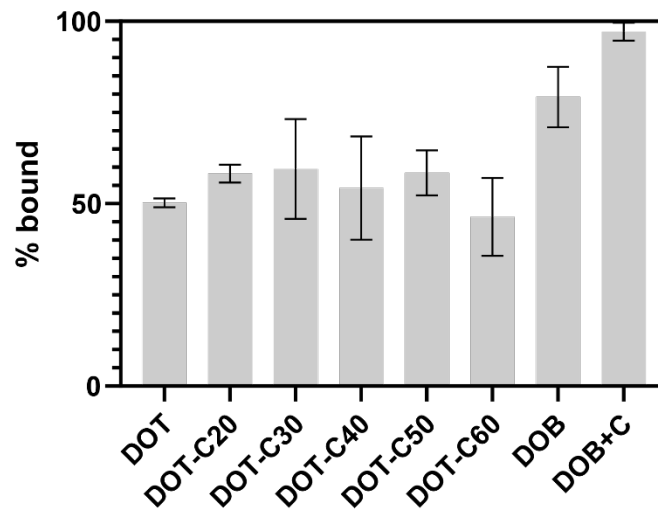

**Supplementary Figure S9:** A. Gel-shift assay to evaluate the membrane binding of different configurations of the DOT versus the DOB, for proximal spacer design. B. Percentage bound tabulated from the two gels.

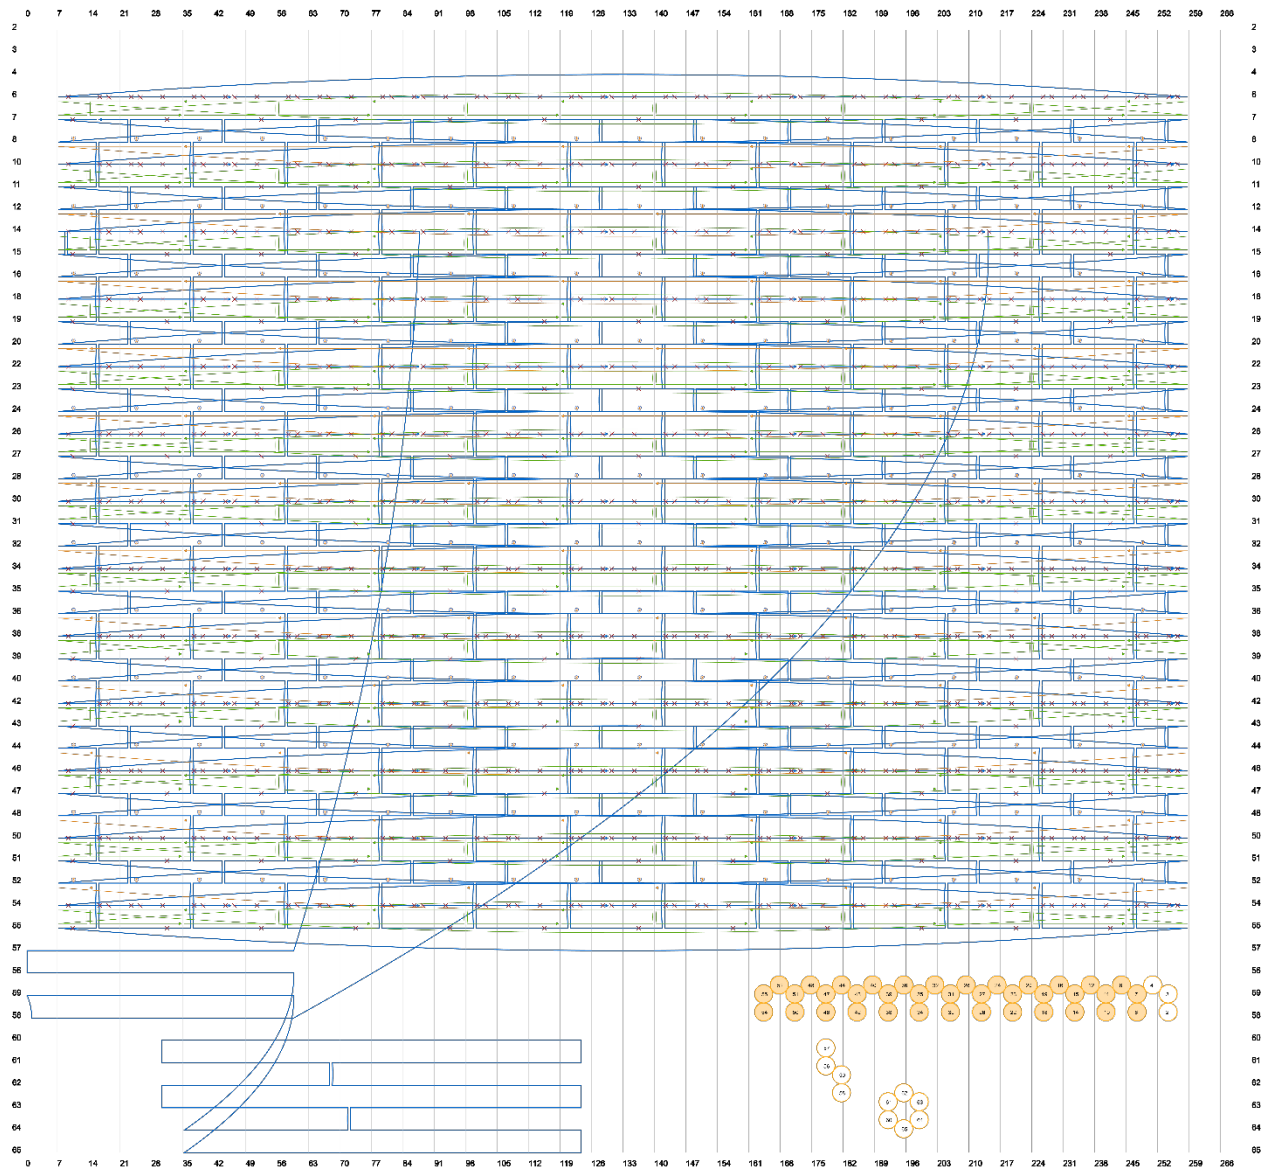

**Supplementary Figure S10:** Cadnano design for the DOB.

**Supplementary Table S2:** Absolute and normalized yields for the DOT samples. These are averages from the two repeats.

| <b>DOT proximal</b>        |                           |                             | <b>DOT rigid-distal-10nt</b>         |                           |                             |
|----------------------------|---------------------------|-----------------------------|--------------------------------------|---------------------------|-----------------------------|
| <b>Sample</b>              | <b>Absolute yield (%)</b> | <b>Normalized yield (%)</b> | <b>Sample</b>                        | <b>Absolute yield (%)</b> | <b>Normalized yield (%)</b> |
| Control                    | 80 ± 5                    | -                           | Control                              | 85 ± 6                    | -                           |
| C20                        | 76 ± 14                   | 95 ± 11                     | C20                                  | 46 ± 5                    | 54 ± 10                     |
| C30                        | 76 ± 12                   | 95 ± 8                      | C30                                  | 33 ± 12                   | 39 ± 11                     |
| C40                        | 76 ± 10                   | 95 ± 6                      | C40                                  | 55 ± 30                   | 64 ± 30                     |
| C50                        | 74 ± 12                   | 93 ± 9                      | C50                                  | 62 ± 18                   | 72 ± 16                     |
| C60                        | 72 ± 8                    | 90 ± 3                      | C60                                  | 69 ± 15                   | 81 ± 11                     |
| R20                        | 76 ± 4                    | 95 ± 1                      | R20                                  | 55 ± 13                   | 64 ± 10                     |
| R30                        | 76 ± 5                    | 95 ± 0.3                    | R30                                  | 61 ± 12                   | 72 ± 9                      |
| R40                        | 75 ± 2                    | 95 ± 4                      | R40                                  | 67 ± 7                    | 79 ± 2                      |
| R50                        | 78 ± 6                    | 97 ± 1                      | R50                                  | 71 ± 10                   | 83 ± 6                      |
| R60                        | 80 ± 3                    | 101 ± 3                     | R60                                  | 70 ± 16                   | 82 ± 12                     |
| <b>DOT flexible-distal</b> |                           |                             | <b>DOT rigid-distal-10T</b>          |                           |                             |
| <b>Sample</b>              | <b>Absolute yield (%)</b> | <b>Normalized yield (%)</b> | <b>Sample</b>                        | <b>Absolute yield (%)</b> | <b>Normalized yield (%)</b> |
| Control                    | 75 ± 6                    | -                           | Control                              | 84 ± 2                    | -                           |
| C20                        | 54 ± 1                    | 72 ± 5                      | C20                                  | 65 ± 2                    | 78 ± 0.3                    |
| C30                        | 65 ± 16                   | 86 ± 15                     | C30                                  | 72 ± 3                    | 85 ± 5                      |
| C40                        | 74 ± 15                   | 99 ± 12                     | C40                                  | 74 ± 6                    | 88 ± 5                      |
| C50                        | 74 ± 17                   | 99 ± 15                     | C50                                  | 78 ± 0                    | 92 ± 1                      |
| C60                        | 74 ± 20                   | 98 ± 19                     | C60                                  | 77 ± 2                    | 91 ± 1                      |
| R20                        | 66 ± 11                   | 88 ± 7                      | R20                                  | 72 ± 7                    | 85 ± 10                     |
| R30                        | 76 ± 13                   | 101 ± 9                     | R30                                  | 72 ± 6                    | 86 ± 9                      |
| R40                        | 77 ± 11                   | 103 ± 6                     | R40                                  | 76 ± 5                    | 90 ± 7                      |
| R50                        | 77 ± 13                   | 103 ± 9                     | R50                                  | 75 ± 1                    | 89 ± 3                      |
| R60                        | 76 ± 16                   | 102 ± 13                    | R60                                  | 76 ± 7                    | 90 ± 10                     |
| <b>DOT rigid-distal</b>    |                           |                             | <b>DOT flexible-rigid-distal-10T</b> |                           |                             |
| <b>Sample</b>              | <b>Absolute yield (%)</b> | <b>Normalized yield (%)</b> | <b>Sample</b>                        | <b>Absolute yield (%)</b> | <b>Normalized yield (%)</b> |
| Control                    | 82 ± 9                    | -                           | Control                              | 78 ± 2                    | -                           |
| C20                        | 13 ± 1                    | 16 ± 3                      | C20                                  | 53 ± 8                    | 68 ± 8                      |
| C30                        | 26 ± 5                    | 33 ± 10                     | C30                                  | 41 ± 13                   | 53 ± 19                     |
| C40                        | 15 ± 19                   | 17 ± 22                     | C40                                  | 62 ± 8                    | 80 ± 13                     |
| C50                        | 19 ± 7                    | 23 ± 6                      | C50                                  | 66 ± 10                   | 85 ± 16                     |
| C60                        | 14 ± 0.2                  | 17 ± 2                      | C60                                  | 69 ± 9                    | 90 ± 15                     |
| R20                        | 35 ± 8                    | 44 ± 15                     | R20                                  | 61 ± 0.5                  | 79 ± 2                      |
| R30                        | 54 ± 1                    | 66 ± 9                      | R30                                  | 61 ± 6                    | 79 ± 11                     |
| R40                        | 43 ± 3                    | 53 ± 2                      | R40                                  | 71 ± 1                    | 91 ± 1                      |
| R50                        | 52 ± 0.1                  | 64 ± 7                      | R50                                  | 74 ± 5                    | 96 ± 9                      |
| R60                        | 34 ± 5                    | 43 ± 11                     | R60                                  | 78 ± 4                    | 101 ± 9                     |

**Supplementary Table S3:** Absolute and normalized yields for all the DOB samples.

| DOB 1-step                           |                    |                      | DOB 2-steps                          |                    |                      |
|--------------------------------------|--------------------|----------------------|--------------------------------------|--------------------|----------------------|
| Sample                               | Absolute yield (%) | Normalized yield (%) | Sample                               | Absolute yield (%) | Normalized yield (%) |
| <b>No detergent</b>                  |                    |                      | <b>No detergent</b>                  |                    |                      |
| Control                              | 49                 | -                    | Control                              | 45                 | -                    |
| Proximal                             | 52                 | 106                  | Proximal                             | 44                 | 97                   |
| flexible-distal                      | 5                  | 10                   | flexible-distal                      | 4                  | 9                    |
| rigid-distal                         | 2                  | 4                    | rigid-distal                         | 18                 | 39                   |
| rigid-distal-10T                     | 22                 | 44                   | rigid-distal-10T                     | 20                 | 44                   |
| rigid-distal-10nt                    | 23                 | 46                   | rigid-distal-10nt                    | 21                 | 46                   |
| <b>Detergent added</b>               |                    |                      | <b>Detergent added</b>               |                    |                      |
| Proximal                             | 55                 | 112                  | Proximal                             | 39                 | 85                   |
| flexible-distal                      | 43                 | 87                   | flexible-distal                      | 38                 | 83                   |
| rigid-distal                         | 52                 | 106                  | rigid-distal                         | 32                 | 70                   |
| rigid-distal-10T                     | 39                 | 78                   | rigid-distal-10T                     | 33                 | 72                   |
| rigid-distal-10nt                    | 48                 | 97                   | rigid-distal-10nt                    | 33                 | 72                   |
| <b>Detergent added, then removed</b> |                    |                      | <b>Detergent added, then removed</b> |                    |                      |
| Proximal                             | 53                 | 107                  | Proximal                             | 35                 | 76                   |
| flexible-distal                      | 36                 | 73                   | flexible-distal                      | 31                 | 68                   |
| rigid-distal                         | 35                 | 72                   | rigid-distal                         | 28                 | 62                   |
| rigid-distal-10T                     | 36                 | 73                   | rigid-distal-10T                     | 26                 | 56                   |
| rigid-distal-10nt                    | 39                 | 78                   | rigid-distal-10nt                    | 27                 | 59                   |

**Supplementary Table S4:** Absolute and normalized yields for the DOT and DOB folded with different number of cholesterol. These are averages from the two repeats.

| DOT                   |                    |                      | DOB                   |                    |                      |
|-----------------------|--------------------|----------------------|-----------------------|--------------------|----------------------|
| Number of cholesterol | Absolute yield (%) | Normalized yield (%) | Number of cholesterol | Absolute yield (%) | Normalized yield (%) |
| 0                     | 81 ± 3             | -                    | 0                     | 79 ± 1             | -                    |
| 1                     | 80 ± 1             | 100 ± 2              | 1                     | 74 ± 0             | 94 ± 1               |
| 2                     | 79 ± 2             | 98 ± 2               | 2                     | 59 ± 2             | 75 ± 3               |
| 3S                    | 65 ± 1             | 80 ± 4               | 3S                    | 36 ± 3             | 46 ± 3               |
| 3C                    | 73 ± 0.1           | 91 ± 4               | 3C                    | 20 ± 2             | 25 ± 3               |
| 4                     | 47 ± 5             | 58 ± 8               | 4                     | 20 ± 3             | 25 ± 4               |
| 5                     | 16 ± 0.5           | 20 ± 1               | 5                     | 7 ± 4              | 9 ± 5                |
| 6                     | 2 ± 0.1            | 2 ± 0                | 6                     | 5 ± 5              | 7 ± 7                |
